# Supplementary material for: Healthcare resource utilization and costs in patients with a newly confirmed diagnosis of lupus nephritis in the United States over a 5-year follow-up period
Source: PubMed Central journal article supplement (PMC11143616; doi:10.1186/s12913-024-11060-6), 2024-05-31
Supplement: 12913_2024_11060_MOESM1_ESM.pdf [file 12913_2024_11060_MOESM1_ESM.pdf]

1 **Additional file**

2 **Additional file 1 (.doc). Healthcare costs (\$) among patients with a newly confirmed diagnosis of LN and at least 5 years of follow-up (n=335)**

|                      | Year 1               | Year 2              | Year 3              | Year 4              | Year 5              |
|----------------------|----------------------|---------------------|---------------------|---------------------|---------------------|
| Medical costs (\$)   |                      |                     |                     |                     |                     |
| Inpatient admissions |                      |                     |                     |                     |                     |
| Mean (SD)            | 21,181 (58,886)      | 7,406 (23,331)      | 8,197 (24,110)      | 8,555 (27,403)      | 9,389 (29,283)      |
| Median (IQR)         | 1,994 (0–19,516)     | 0 (0–0)             | 0 (0–0)             | 0 (0–3,207)         | 0 (0–787)           |
| ER visits            |                      |                     |                     |                     |                     |
| Mean (SD)            | 1,194 (2,536)        | 869 (2,477)         | 1,087 (2,877)       | 1,077 (2,702)       | 1,250 (3,236)       |
| Median (IQR)         | 205 (0–1,277)        | 0 (0–612)           | 0 (0–820)           | 54 (0–882)          | 0 (0–862)           |
| Ambulatory visits    |                      |                     |                     |                     |                     |
| Mean (SD)            | 11,925 (27,798)      | 10,622 (29,077)     | 10,017 (21,413)     | 9,943 (20,801)      | 9,164 (17,807)      |
| Median (IQR)         | 5,555 (2,388–11,589) | 4,614 (1,848–9,315) | 3,912 (1,970–9,953) | 4,141 (1,696–9,494) | 3,859 (1,865–8,167) |
| Other <sup>a</sup>   |                      |                     |                     |                     |                     |
| Mean (SD)            | 2,018 (7,978)        | 1,579 (7,101)       | 1,263 (2,979)       | 1,652 (5,391)       | 1,802 (6,423)       |

|                     |                     |                     |                     |                     |                     |
|---------------------|---------------------|---------------------|---------------------|---------------------|---------------------|
| Median (IQR)        | 590 (195–1,985)     | 374 (82–1,298)      | 331 (95–1,042)      | 351 (118–1,114)     | 385 (113–1,110)     |
| Pharmacy costs (\$) |                     |                     |                     |                     |                     |
| Mean (SD)           | 7,887 (18,337)      | 8,969 (26,886)      | 8,919 (30,245)      | 10,994 (37,919)     | 9,412 (31,079)      |
| Median (IQR)        | 2,734 (1,154–6,647) | 3,076 (1,291–6,373) | 2,912 (1,262–6,328) | 2,951 (1,283–6,832) | 2,776 (1,178–6,466) |

---

3 <sup>a</sup>Other medical costs include costs for services rendered at independent laboratories, at assisted living facilities, at urgent care clinics, and by

4 home health providers.

5 ER, emergency room; IQR, interquartile range; LN, lupus nephritis; SD, standard deviation.
